# Supplementary material
Source: PubMed Central journal article supplement (PMC9050875)
Supplement: NIHMS1782466-supplement-Supplementary_Material.pdf [file NIHMS1782466-supplement-Supplementary_Material.pdf]

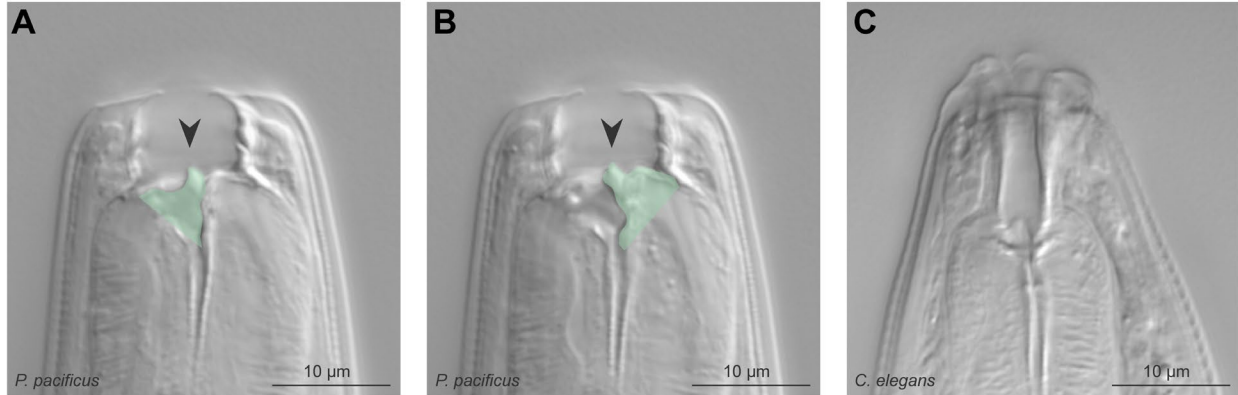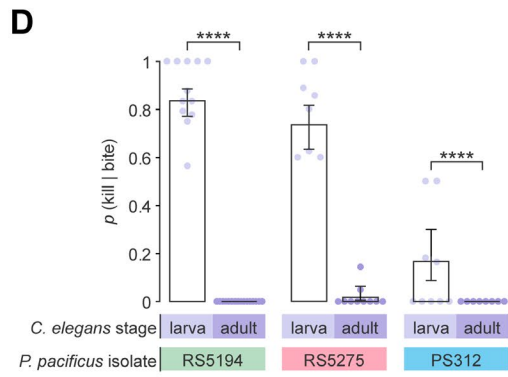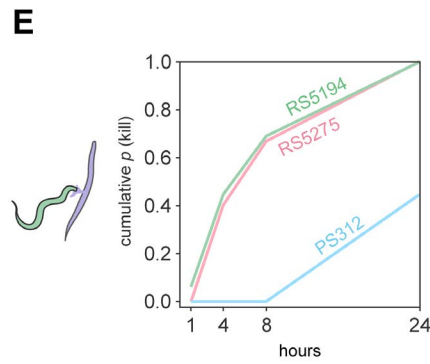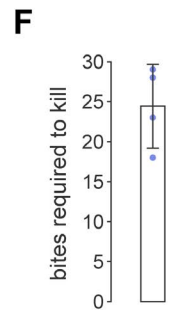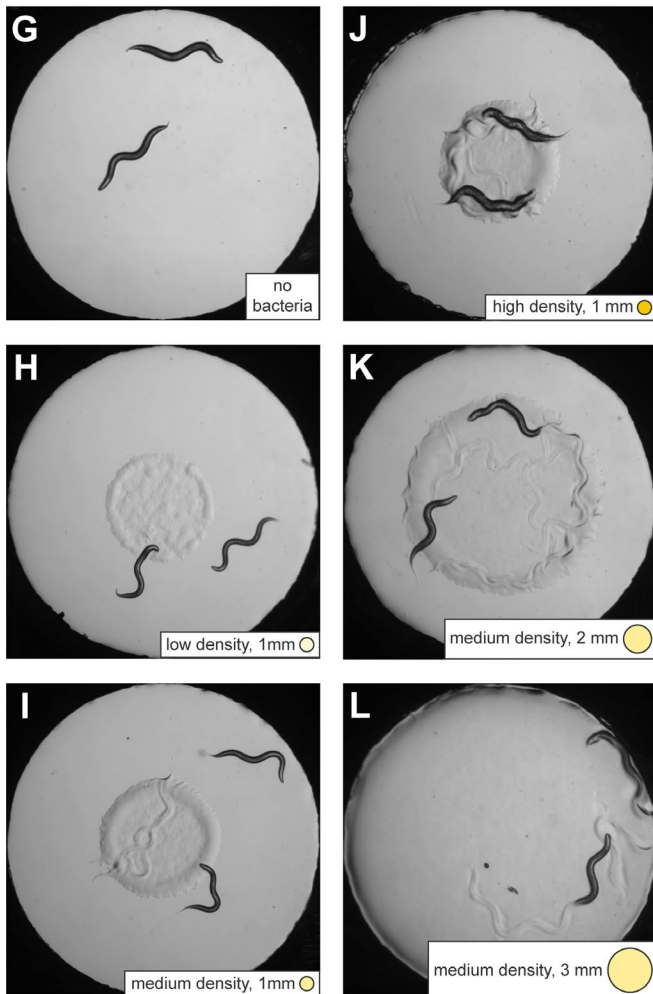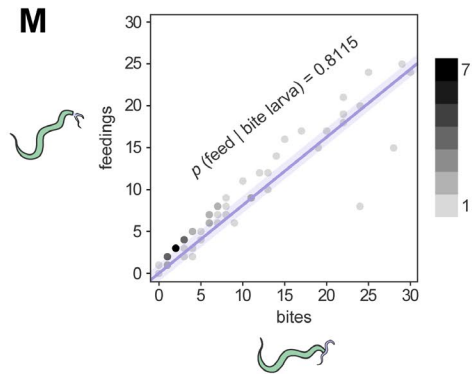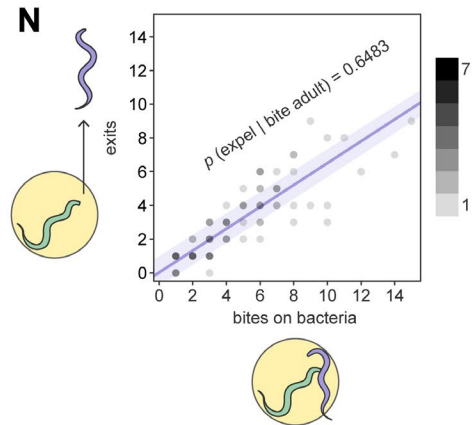

**Figure S1. Outcomes of biting *C. elegans* off and on bacteria, related to Figures 1A–1K**

(A–B) Pseudo-colored (A) ventral and (B) dorsal tooth of eury stomatous adult *P. pacificus* (strain: RS5194).

(C) Toothless mouth of adult *C. elegans* (strain: N2)

(D) Instantaneous killing ability of different wild isolates of *P. pacificus*, expressed as probability of killing *C. elegans* given a single bite, (Wald test with Benjamini-Hochberg adjustment,  $n_{P.pacificus} = 8-16$ ,  $n_{bites\_per\_P.pacificus} = 1-39$ ). RS5194 *P. pacificus* was selected for experiments featured in main figures.

(E) Long-term killing ability of different wild isolates of *P. pacificus*, expressed as cumulative probability of a killing a single adult *C. elegans* by various time points ( $n_{P.pacificus} = 11-16$ ). RS5194 *P. pacificus* was selected for experiments featured in main figures.

(F) Number of bites that a single adult RS5194 *P. pacificus* inflicted to kill a single adult *C. elegans*.

(G–L) Arenas with various densities and diameters of *E. coli* OP50 bacterial patches (see Methods: Bacterial patches).

(M) Number of larva-targeted bites that lead to predatory feeding ( $n_{P.pacificus} = 60$ ,  $n_{bites\_per\_P.pacificus} = 1-31$ ). Data points were pooled from all conditions in Figure 1J.

(N) Number of adult-targeted bites on bacteria that lead to adult *C. elegans* exiting the bacterial patch ( $n_{P.pacificus} = 77$ ,  $n_{bites\_per\_P.pacificus} = 1-14$ ). Data points were pooled from all conditions in Figure 1K.

(D,M,N) Error bars are predicted probabilities and 95% confidence intervals from binomial logistic regression models of data.

Other error bars are 95% bootstrap confidence intervals.

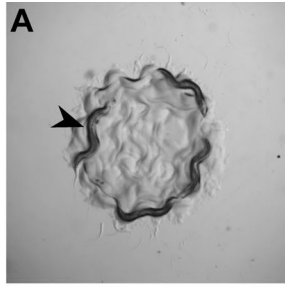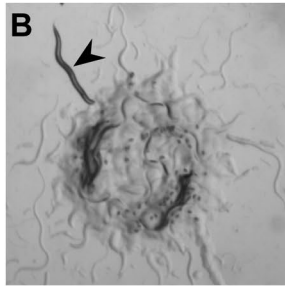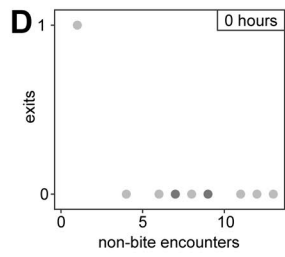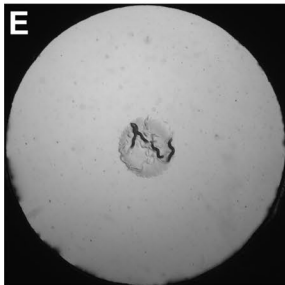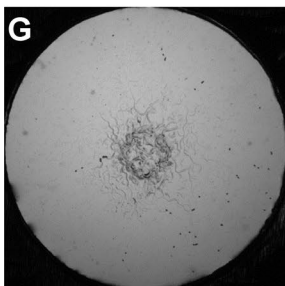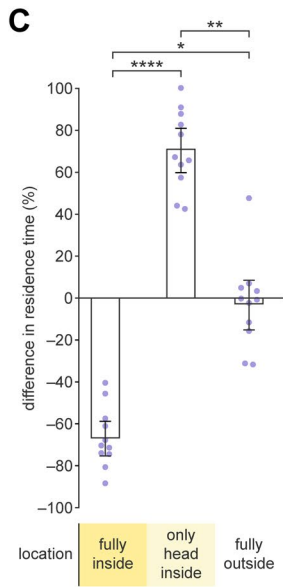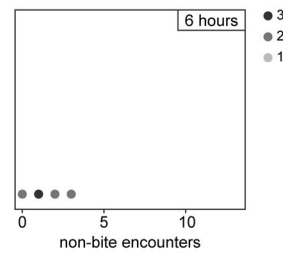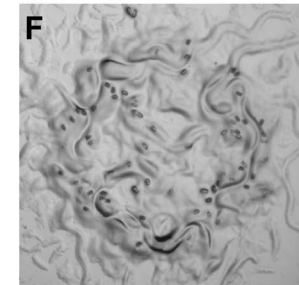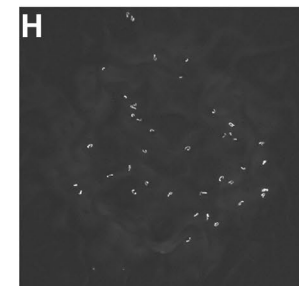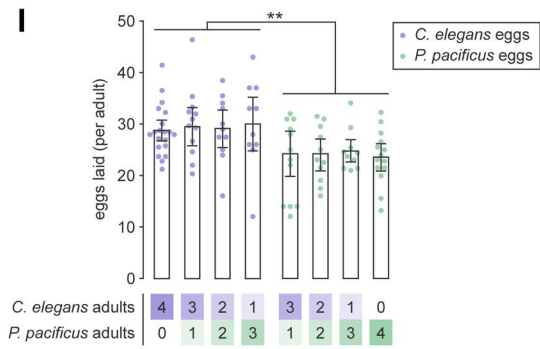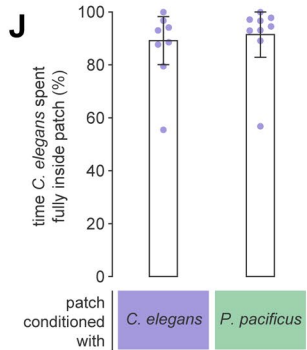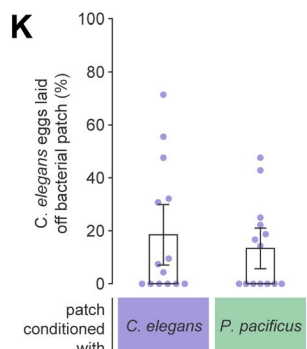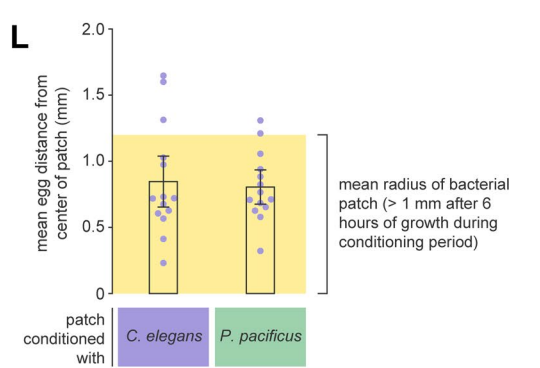

**Figure S2. Biting-induced patch avoidance and egg-laying, related to Figures 1L–1N and Figure 2**

(A–B) Single adult *C. elegans* (black arrow) with three adult *P. pacificus* after (A) 0 hours, and (B) 6 hours.

(C) Difference between 0 and 6 hours in adult *C. elegans* residence time on different regions of a bacteria patch occupied by *P. pacificus* (Dunn's test with Benjamini–Hochberg correction,  $n_{C.elegans} = 11$ ).

(D) Number of non-bite encounters that were followed by adult *C. elegans* leaving a bacteria patch, at 0 and 6 hours of predator exposure. Each data point represents an individual arena with 1 *P. pacificus* and 1 adult *C. elegans* ( $n_{arena} = 9–11$ ,  $n_{non-bite\_encounters\_per\_arena} = 0–13$ ). Shading indicates that multiple arenas had the same number of non-bite encounters and exits.

(E–F) Egg distribution assay at (E) 0 hours with four adult nematodes (2 *P. pacificus*, 2 *C. elegans*), and at (F) 7 hours with adults removed.

(G–H) Zoomed-in (G) brightfield and (H) fluorescent view of the bacterial patch in (E).

Fluorescent eggs are *C. elegans* (GFP-labeled), while non-fluorescent eggs are *P. pacificus*.

(I) Total eggs laid per *C. elegans* and *P. pacificus* adult, across mixed-species groups (Dunn's test,  $n_{arenas} = 10–20$ ). Eggs were pooled within species for comparison between species.

(J–L) Bacterial patches were conditioned with either *C. elegans* or *P. pacificus* pheromones (See Methods: Pheromone-conditioned patches). (J) Residence time on conditioned patches

(Wilcoxon's signed rank test,  $n_{C.elegans} = 10$ ). (K) Percent of eggs laid off conditioned patches

(Wilcoxon's signed rank test,  $n_{C.elegans} = 14$ ). (L) Mean egg distance from center of conditioned

patches, with yellow shading indicating distances that fall within the bacterial patch (t-test,  $n_{C.elegans} = 14$ ).

Error bars are 95% bootstrap confidence intervals.

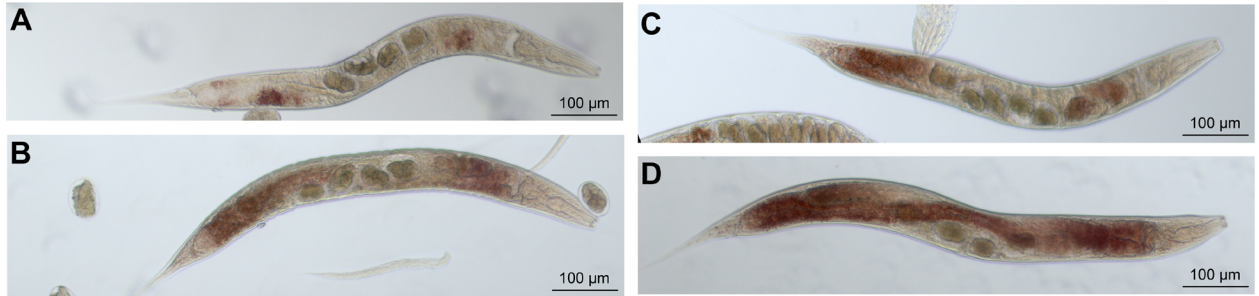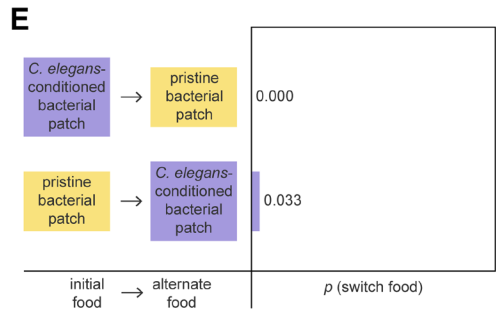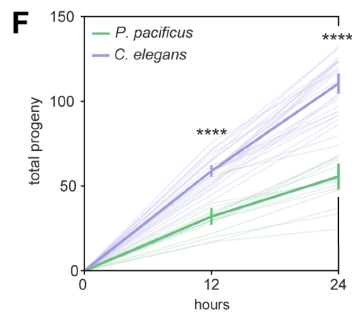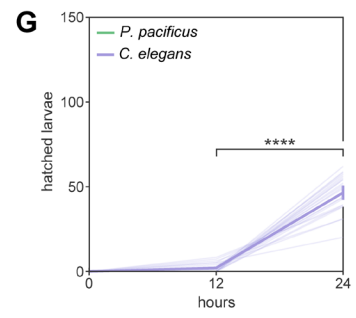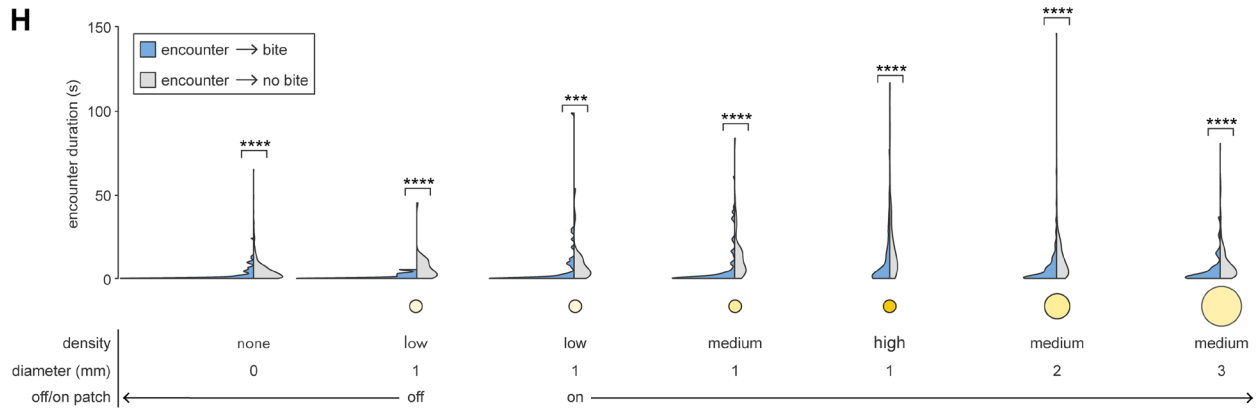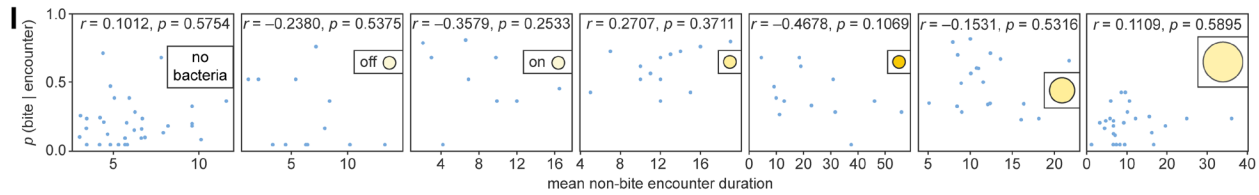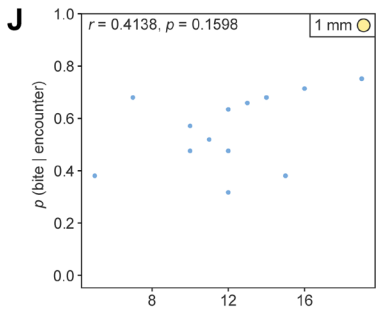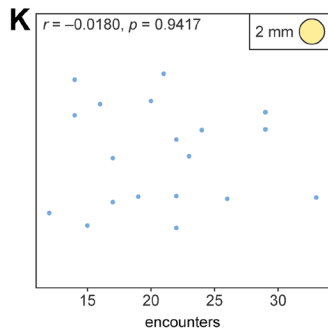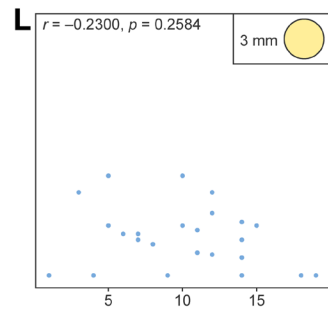

**Figure S3. Influences on and assessment of biting incentive, related to Figure 3**

(A–D) Representative images of *P. pacificus* stained with Oil Red O after 6 hours of exclusively feeding on (A) nothing, (B) larval *C. elegans*, (C) adult *C. elegans*, and (D) *E. coli* OP50 bacteria.

(E) Probability of *P. pacificus* switching between a *C. elegans*-conditioned patch (see Methods: Pheromone-conditioned patches) and a pristine (unconditioned) patch (Fisher's exact test,  $n_{P.pacificus} = 30$ ).

(F) Total progeny produced by a single adult *P. pacificus* or *C. elegans* (Wilcoxon's ranked sum test with Benjamini–Hochberg adjustment,  $n_{adult} = 16–23$ ).

(G) *C. elegans* eggs that hatched into larvae (Wilcoxon's signed rank test,  $n_{C.elegans} = 16–23$ ). No *P. pacificus* eggs hatched within 24 hours.

(H) Distributions of durations for bite encounters and non-bite encounters on different types of patches. Encounters were pooled across animals within each patch type. Each distribution is plotted as a probability density function (same area under each curve) (Dunn's test,  $n_{encounters} = 10–492$ ).

(I) Correlation between non-bite encounter duration and probability of biting during an encounter, for different patch types (Pearson's  $r$ ,  $n_{arena} = 9–33$ ).

(J–L) Correlation between number of encounters and probability of biting during an encounter on a medium density lawn with various diameters (Pearson's  $r$ ,  $n_{arena} = 13–26$ ).

Error bars are 95% bootstrap confidence intervals.

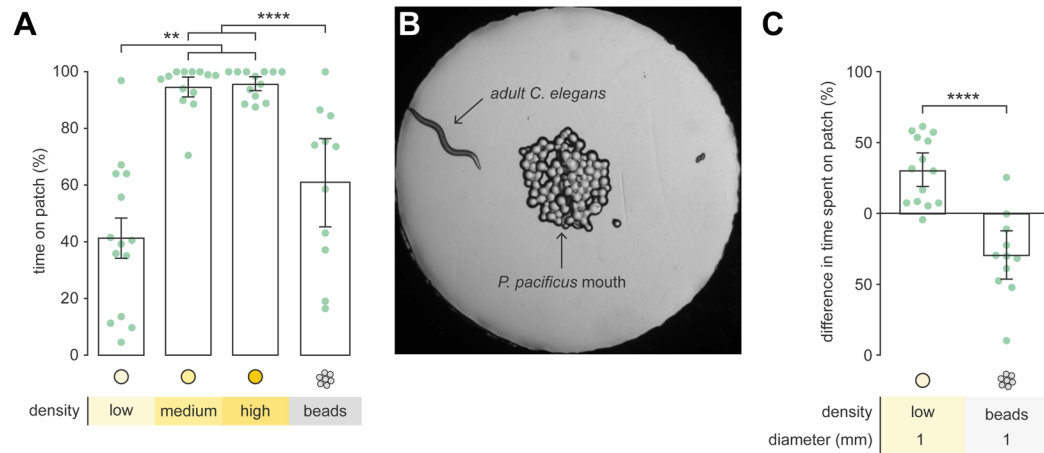

**Figure S4. *P. pacificus* residence time on different types of patches, related to Figure 4**

(A) *P. pacificus* patch residence time on different types of bacterial and non-bacterial patches (Dunn's test,  $n_{P.pacificus} = 11-14$ ).

(B) 1 mm patch of rehydrated Sephadex beads (See STAR Methods: Bead patches), with adult *C. elegans* and *P. pacificus*. *P. pacificus* is fully inside the bead patch.

(C) Difference between 0–15 minutes and 15–30 minutes in patch residence time (t-test,  $n_{P.pacificus} = 11-14$ ).

Error bars are 95% bootstrap confidence intervals.

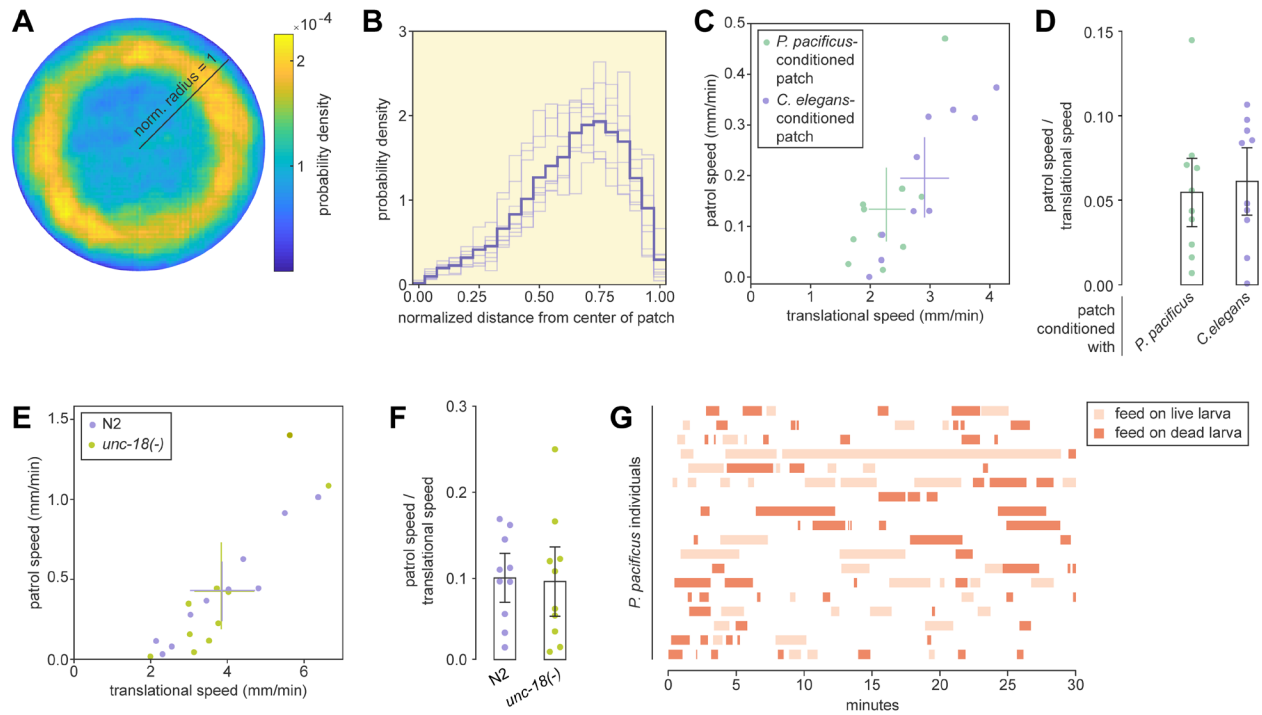

**Figure S5. Active and passive search for *C. elegans*, related to Figure 5**

(A–B) Histograms of *C. elegans* larvae movement on a medium density, 1 mm bacterial patch (see Methods: Larvae movement). To obtain relative patch locations, all patches were normalized to have a radius of 1. Each bin value represents the probability density of video frames showing larval movement at that location/distance. (A) 2-dimensional location on the patch. (B) 1-dimensional distance from the center of the patch.

(C–D) *P. pacificus* patrolling on *P. pacificus*- and *C. elegans*-conditioned patches (see Methods: Pheromone-conditioned patches). (C) Translational and patrol speeds (Wilcoxon’s signed rank test,  $n_{P.pacificus} = 10$ ). (D) patrol speed normalized by translational speed (t-test,  $n_{P.pacificus} = 10$ )

(E–F) *P. pacificus* patrolling with locomotion-defective *C. elegans* mutant (*unc-18(-)*) and control wildtype *C. elegans* (N2) patch cohabitants. (E) Translational and patrol speeds (Wilcoxon’s signed rank test,  $n_{P.pacificus} = 10$ ). (F) Patrol speed normalized by translational speed (t-test,  $n_{P.pacificus} = 10$ ).

(G) Timecourses of when *P. pacificus* feeds on live or dead (previously killed) larvae, after three hours with larvae on a bacteria-free arena ( $n_{P.pacificus} = 18$ ). Each row represents the timecourse for an individual *P. pacificus*.

Error bars are 95% bootstrap confidence intervals.



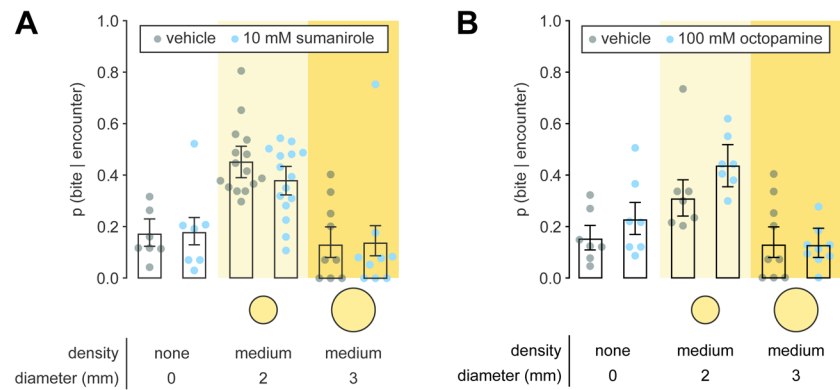

**Figure S6. Dopamine D2 receptor agonist and octopamine do not affect territorial biting, related to Figure 6**

(A–B)  $p(\text{bite}|\text{encounter})$  for *P. pacificus* treated with (A) the dopamine D2 receptor agonist, sumanirole (Wald test with Benjamini-Hochberg adjustment,  $n_{P. pacificus} = 7-15$ ,  $n_{\text{encounters per } P. pacificus} = 7-38$ ), and (B) octopamine (Wald test with Benjamini-Hochberg adjustment,  $n_{P. pacificus} = 7-9$ ,  $n_{\text{encounters per } P. pacificus} = 8-42$ ). Drug concentrations refer to the concentration of drug solution applied to a bacterial patch for treatment (see Methods: Drug treatment). Error bars are predicted probabilities and 95% confidence intervals from binomial logistic regression models of data.

| Figure                  | Predicted value                                    | Model type                   | $\chi^2$ | df | $p (> \chi^2)$ |
|-------------------------|----------------------------------------------------|------------------------------|----------|----|----------------|
| 1H                      | p(kill bite)                                       | binomial logistic regression | 354.48   | 1  | < 2.2e-16      |
| 1J                      | p(feed bite larva)                                 | binomial logistic regression | 15.346   | 5  | 0.008982       |
| 1K                      | p(expel bite adult)                                | binomial logistic regression | 3.606    | 4  | 0.4619         |
| 2B, <i>C. elegans</i>   | distance from center of patch                      | linear mixed-effects model   | 42.594   | 3  | 3.001e-09      |
| 2B, <i>P. pacificus</i> | distance from center of patch                      | linear mixed-effects model   | 5.1518   | 3  | 0.161          |
| 2C                      | p( <i>C. elegans</i> egg laid off bacterial patch) | binomial logistic regression | 602.23   | 3  | < 2.2e-16      |
| 2E                      | p(find bacterial batch)                            | binomial logistic regression | 236.71   | 5  | < 2.2e-16      |
| 3E                      | p(bite encounter)                                  | binomial logistic regression | 129.05   | 6  | < 2.2e-16      |
| 3F                      | p(bite encounter)                                  | binomial logistic regression | 263.49   | 6  | < 2.2e-16      |
| 4C                      | p(bite encounter)                                  | binomial logistic regression | 49.122   | 2  | 2.154e-11      |
| 6A, none                | p(bite encounter)                                  | binomial logistic regression | 0.5656   | 1  | 0.452          |
| 6A, med-density, 2 mm   | p(bite encounter)                                  | binomial logistic regression | 18.839   | 1  | 1.423e-05      |
| 6A, med-density, 3 mm   | p(bite encounter)                                  | binomial logistic regression | 0.1518   | 1  | 0.6969         |
| 6B, none                | p(bite encounter)                                  | binomial logistic regression | 15.911   | 1  | 6.641e-05      |
| 6B, med-density, 2 mm   | p(bite encounter)                                  | binomial logistic regression | 18.869   | 1  | 1.4e-05        |
| 6B, med-density, 3 mm   | p(bite encounter)                                  | binomial logistic regression | 8.0161   | 1  | 0.004636       |
| S1D, RS5194             | p(kill bite)                                       | binomial logistic regression | 354.48   | 1  | < 2.2e-16      |
| S1D, RS5275             | p(kill bite)                                       | binomial logistic regression | 140.5    | 1  | < 2.2e-16      |
| S1D, PS312              | p(kill bite)                                       | binomial logistic regression | 16.205   | 1  | 5.685e-05      |
| S6A, none               | p(bite encounter)                                  | binomial logistic regression | 0.0229   | 1  | 0.8797         |
| S6A, med-density, 2 mm  | p(bite encounter)                                  | binomial logistic regression | 3.0109   | 1  | 0.08271        |
| S6A, med-density, 3 mm  | p(bite encounter)                                  | binomial logistic regression | 0.0261   | 1  | 0.8717         |
| S6B, none               | p(bite encounter)                                  | binomial logistic regression | 3.5778   | 1  | 0.05856        |
| S6B, med-density, 2 mm  | p(bite encounter)                                  | binomial logistic regression | 5.2815   | 1  | 0.02155        |
| S6B, med-density, 3 mm  | p(bite encounter)                                  | binomial logistic regression | 0.002    | 1  | 0.9648         |

**Table S1: Goodness of fit of statistical models, related to STAR Methods**

For binomial logistic regression models and linear mixed-effects models, full models were compared to null models using likelihood ratio test.
